# Supplementary material
Source: Royal Society of Chemistry journal article supplement (doi:10.1039/d6dt01134a)
Supplement: d6dt01134a1.pdf [file d6dt01134a1.pdf]

Electronic Supplementary Information for:

**Porous Ni-Based Metal-Organic Frameworks Reduce the Oxygen Evolution**

**Temperature of Lithium Perchlorate**

*Nicholas A. Tomalia,<sup>a</sup> Yulia Rakova,<sup>a</sup> Ashley Tubman,<sup>a</sup> and Adam J. Matzger<sup>\*a,b</sup>*

<sup>a</sup>Department of Chemistry, University of Michigan, 930 North University Avenue, Ann Arbor, MI 48109, United States

<sup>b</sup>Macromolecular Science and Engineering Program, University of Michigan, Ann Arbor, MI 48109, United States

\*To whom correspondence should be addressed. Email address: matzger@umich.edu

**Table of Contents**

S1. Characterization

S2. Bimetallic catalyst study

S3. References

## S1. Characterization

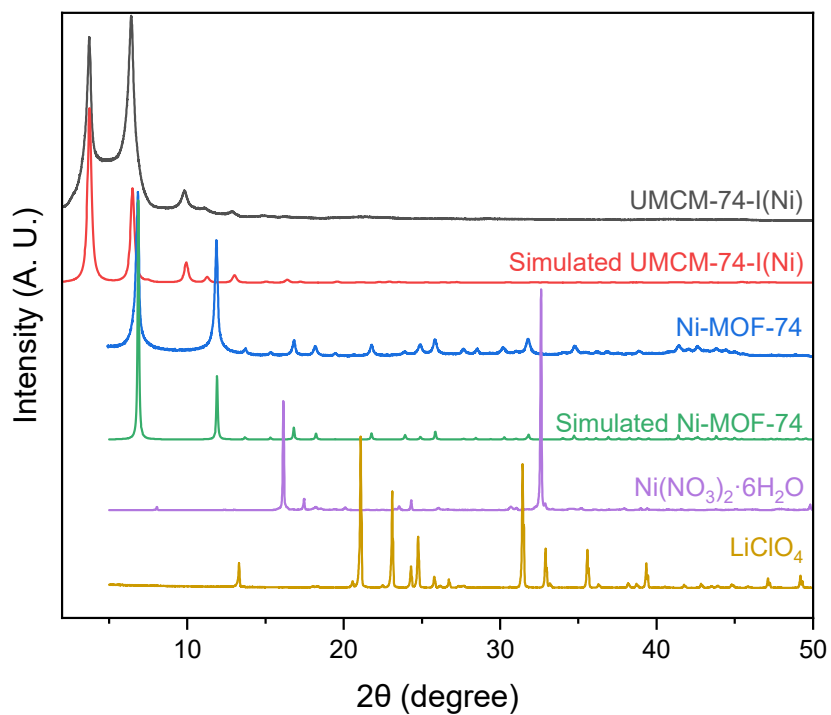

**Figure S1.** PXRD patterns of UMCM-74-I(Ni) (black), simulated UMCM-74-I(Ni)<sup>1</sup> (red), Ni-MOF-74 (blue), simulated Ni-MOF-74 (green; ref code: EWIZOC), Ni(NO<sub>3</sub>)<sub>2</sub>·6H<sub>2</sub>O (purple), and LiClO<sub>4</sub> (gold).

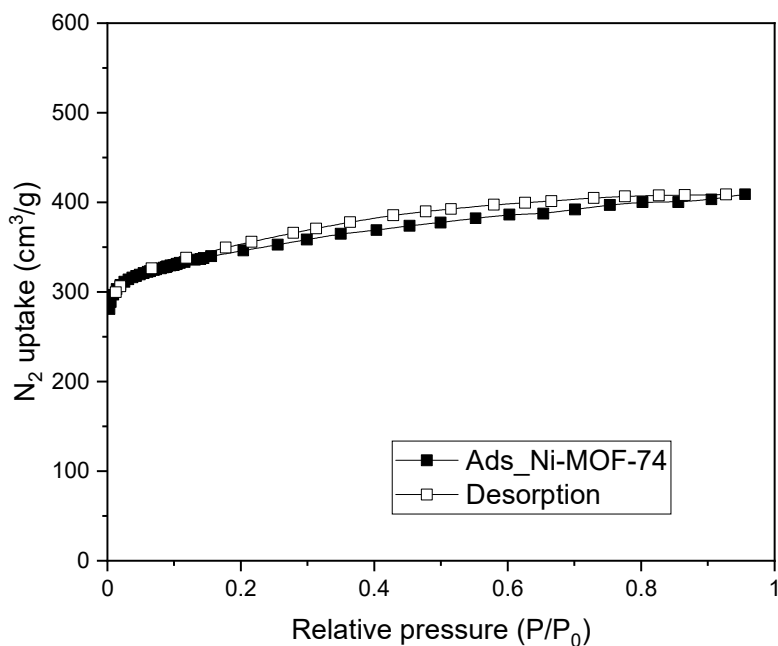

**Figure S2.** N<sub>2</sub> sorption isotherm for activated Ni-MOF-74, BET surface area = 1328 m<sup>2</sup> g<sup>-1</sup>, pore volume = 0.57 cm<sup>3</sup> g<sup>-1</sup>.

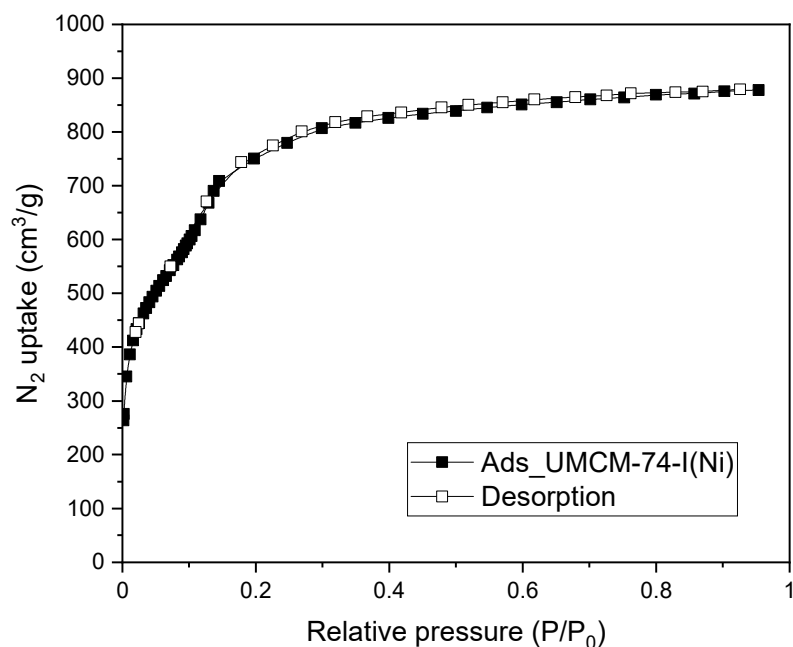

**Figure S3.** N<sub>2</sub> sorption isotherm for activated UMCM-74-I(Ni), BET surface area = 2479 m<sup>2</sup> g<sup>-1</sup>, pore volume = 1.40 cm<sup>3</sup> g<sup>-1</sup>.

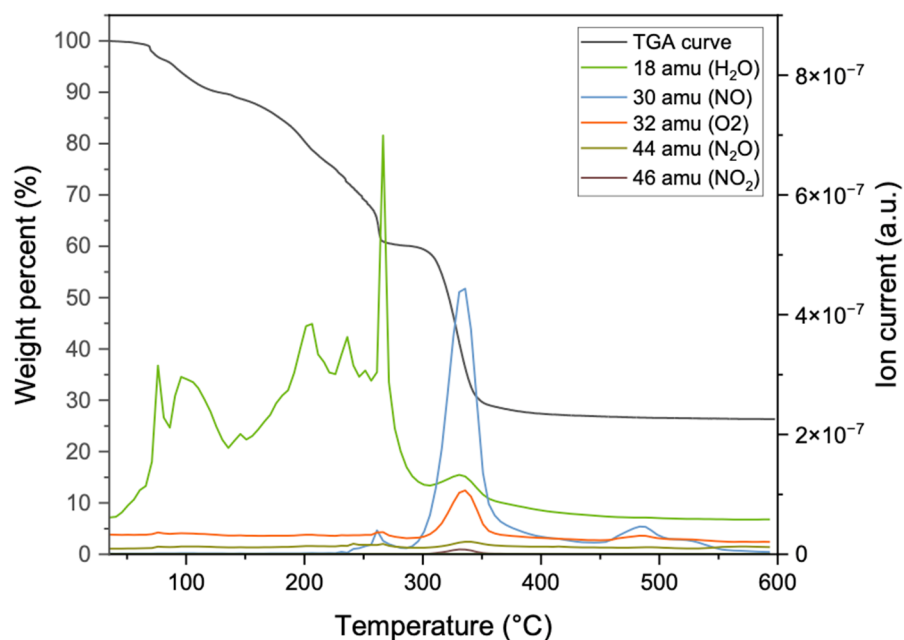

**Figure S4.** TGA-MS data collected for Ni(NO<sub>3</sub>)<sub>2</sub>·6H<sub>2</sub>O showing the weight loss associated with dehydration and subsequent decomposition (black) and the monitored *m/z* for H<sub>2</sub>O (green), NO (blue), O<sub>2</sub> (orange), N<sub>2</sub>O (olive green), and NO<sub>2</sub> (brown).

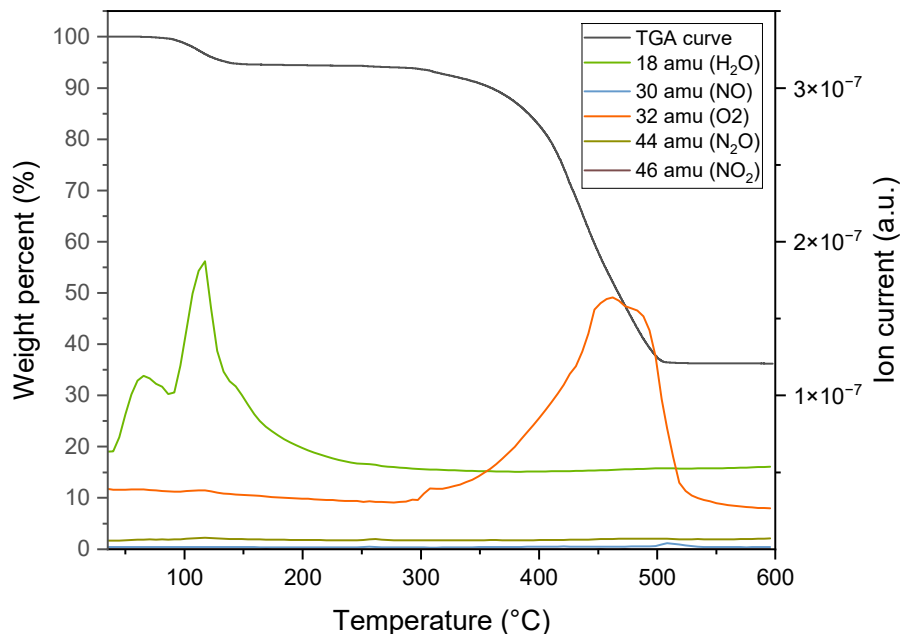

**Figure S5.** TGA-MS data collected for  $\text{LiClO}_4/\text{Ni}(\text{NO}_3)_2 \cdot 6\text{H}_2\text{O}$  mixture with 0.42 wt% Ni content showing the weight loss associated with dehydration and subsequent decomposition (black) and the monitored  $m/z$  for  $\text{H}_2\text{O}$  (green),  $\text{NO}$  (blue),  $\text{O}_2$  (orange),  $\text{N}_2\text{O}$  (olive green), and  $\text{NO}_2$  (brown). During decomposition 0.3 mol%  $\text{H}_2\text{O}$ , 0.7 mol%  $\text{NO}$ , 0.4 mol%  $\text{N}_2\text{O}$ , and 98.6 mol%  $\text{O}_2$  is detected by MS.

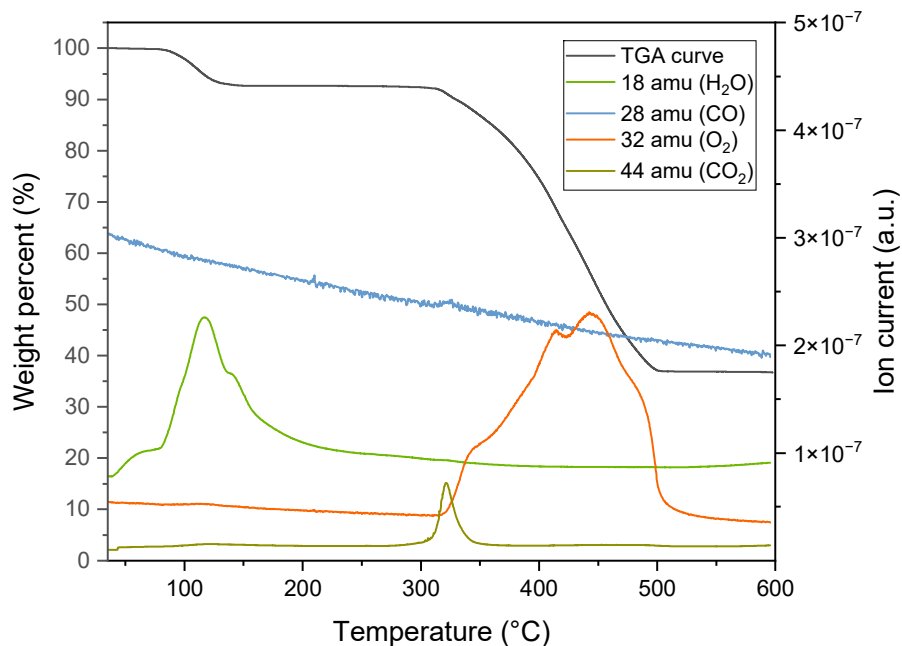

**Figure S6.** TGA-MS data collected for  $\text{LiClO}_4/\text{Ni-MOF-74}$  mixture with 0.42 wt% Ni content showing the weight loss associated with dehydration and subsequent decomposition (black) and the monitored  $m/z$  for  $\text{H}_2\text{O}$  (green),  $\text{CO}$  (blue),  $\text{O}_2$  (orange), and  $\text{CO}_2$  (olive green). During decomposition 0.2 mol%  $\text{CO}$ , 2.5 mol%  $\text{CO}_2$ , and 97.3 mol%  $\text{O}_2$  is detected by MS.

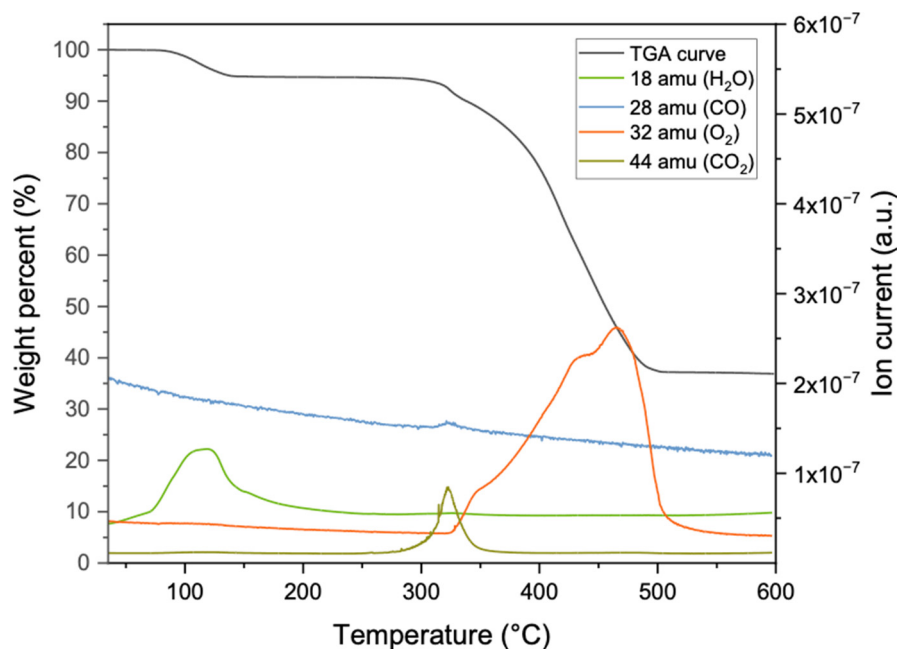

**Figure S7.** TGA-MS data collected for  $\text{LiClO}_4/\text{UMCM-74-I(Ni)}$  mixture with 0.42 wt% Ni content showing the weight loss associated with dehydration and subsequent decomposition (black) and the monitored  $m/z$  for  $\text{H}_2\text{O}$  (green),  $\text{CO}$  (blue),  $\text{O}_2$  (orange), and  $\text{CO}_2$  (olive green). During decomposition 0.4 mol%  $\text{CO}$ , 4.4 mol%  $\text{CO}_2$ , and 95.2 mol%  $\text{O}_2$  is detected by MS.

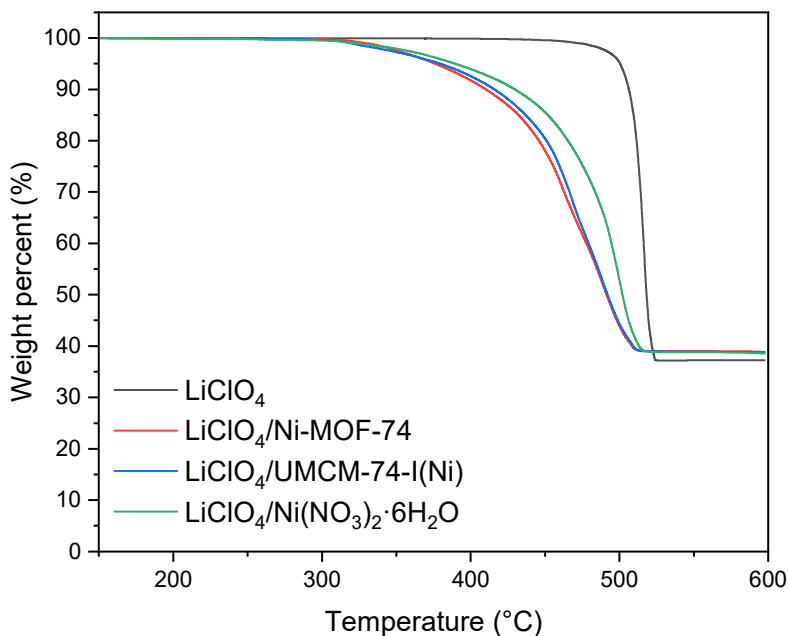

**Figure S8.** TGA thermograms (10 °C/min) showing the decomposition of pure  $\text{LiClO}_4$  (black) and  $\text{LiClO}_4/\text{Ni-MOF-74}$  (red),  $\text{LiClO}_4/\text{UMCM-74-I(Ni)}$  (blue), and  $\text{LiClO}_4/\text{Ni(NO}_3)_2 \cdot 6\text{H}_2\text{O}$  (green) mixtures containing 0.21 wt% Ni loading after dehydration.

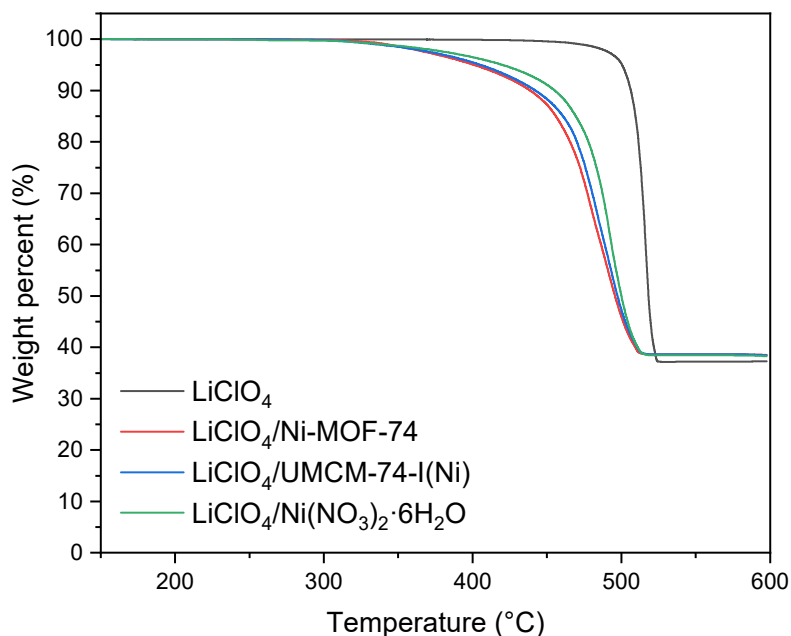

**Figure S9.** TGA thermograms (10 °C/min) showing the decomposition of pure LiClO<sub>4</sub> (black) and LiClO<sub>4</sub>/Ni-MOF-74 (red), LiClO<sub>4</sub>/UMCM-74-I(Ni) (blue), and LiClO<sub>4</sub>/Ni(NO<sub>3</sub>)<sub>2</sub>·6H<sub>2</sub>O (green) mixtures containing 0.10 wt% Ni loading after dehydration.

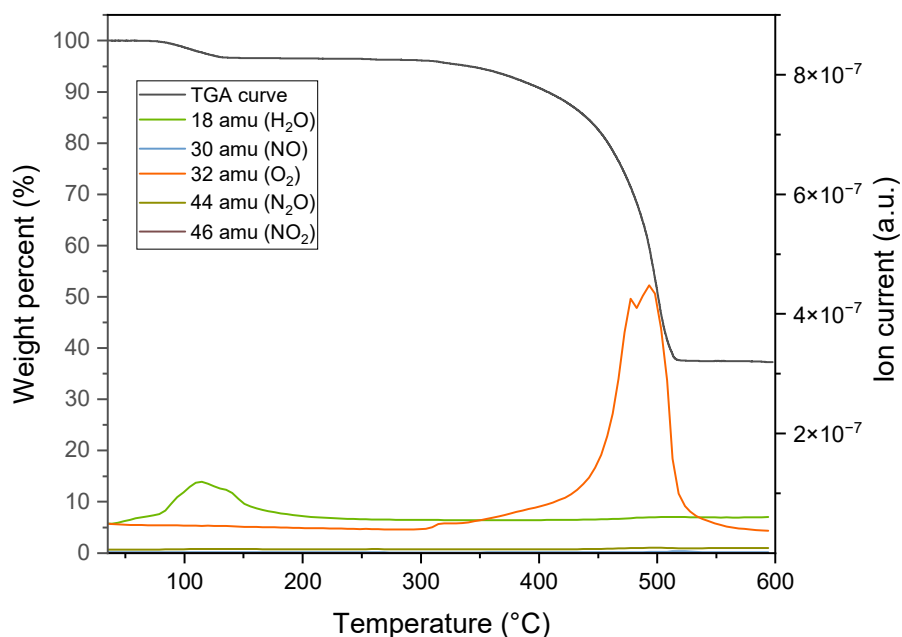

**Figure S10.** TGA-MS data collected for LiClO<sub>4</sub>/Ni(NO<sub>3</sub>)<sub>2</sub>·6H<sub>2</sub>O mixture with 0.21 wt% Ni content showing the weight loss associated with dehydration and subsequent decomposition (black) and the monitored *m/z* for H<sub>2</sub>O (green), NO (blue), O<sub>2</sub> (orange), N<sub>2</sub>O (olive green), and NO<sub>2</sub> (brown). During decomposition 0.2 mol% H<sub>2</sub>O, 0.4 mol% NO, 0.2 mol% N<sub>2</sub>O, and 99.2 mol% O<sub>2</sub> is detected by MS.

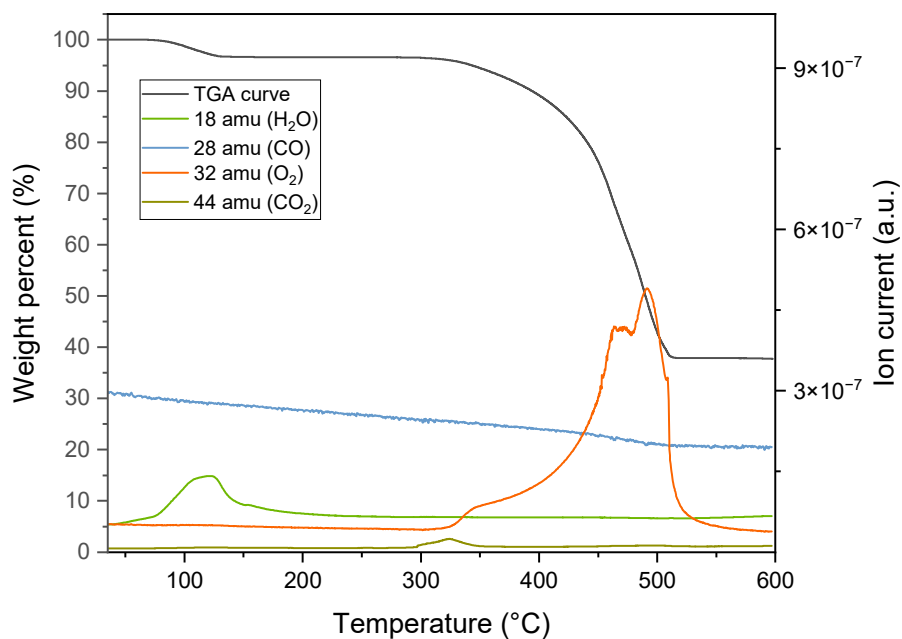

**Figure S11.** TGA-MS data collected for  $\text{LiClO}_4/\text{Ni-MOF-74}$  mixture with 0.21 wt% Ni content showing the weight loss associated with dehydration and subsequent decomposition (black) and the monitored  $m/z$  for  $\text{H}_2\text{O}$  (green),  $\text{CO}$  (blue),  $\text{O}_2$  (orange), and  $\text{CO}_2$  (olive green). During decomposition 0.1 mol%  $\text{CO}$ , 1.3 mol%  $\text{CO}_2$ , and 98.6 mol%  $\text{O}_2$  is detected by MS.

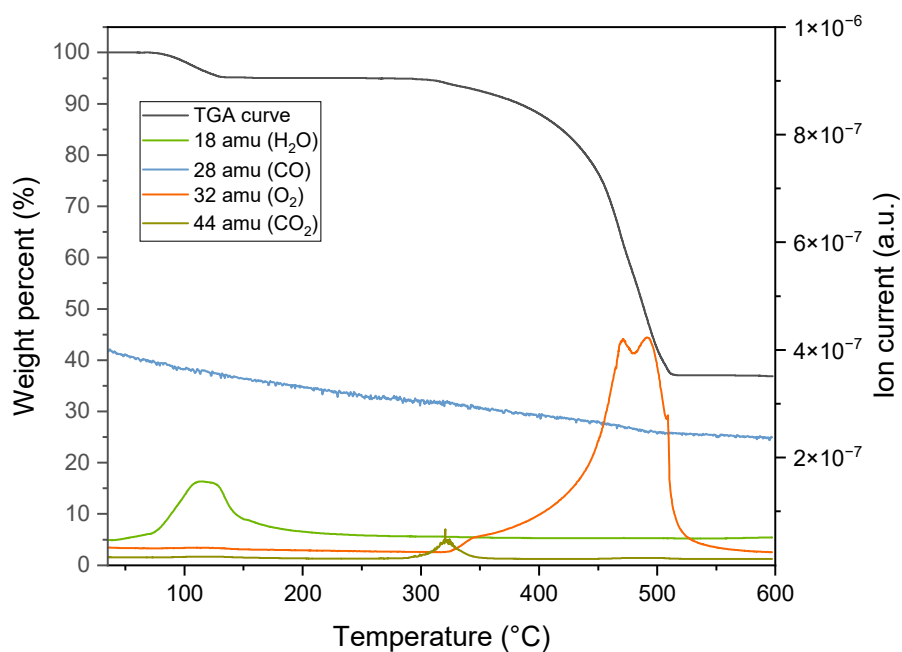

**Figure S12.** TGA-MS data collected for  $\text{LiClO}_4/\text{UMCM-74-I(Ni)}$  mixture with 0.21 wt% Ni content showing the weight loss associated with dehydration and subsequent decomposition (black) and the monitored  $m/z$  for  $\text{H}_2\text{O}$  (green),  $\text{CO}$  (blue),  $\text{O}_2$  (orange), and  $\text{CO}_2$  (olive green). During decomposition 0.2 mol%  $\text{CO}$ , 2.1 mol%  $\text{CO}_2$ , and 97.7 mol%  $\text{O}_2$  is detected by MS.

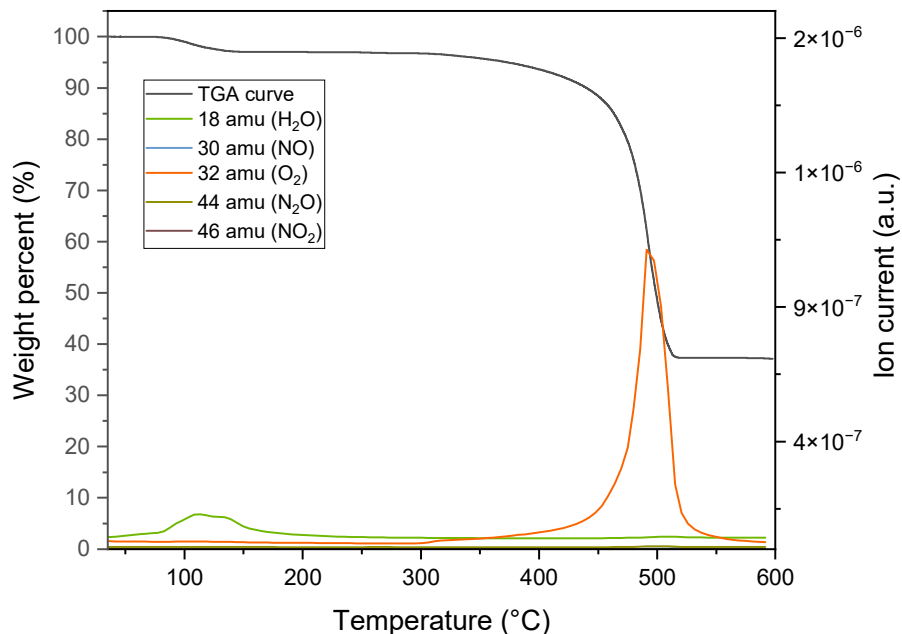

**Figure S13.** TGA-MS data collected for  $\text{LiClO}_4/\text{Ni}(\text{NO}_3)_2 \cdot 6\text{H}_2\text{O}$  mixture with 0.10 wt% Ni content showing the weight loss associated with dehydration and subsequent decomposition (black) and the monitored  $m/z$  for  $\text{H}_2\text{O}$  (green),  $\text{NO}$  (blue),  $\text{O}_2$  (orange),  $\text{N}_2\text{O}$  (olive green), and  $\text{NO}_2$  (brown). During decomposition 0.1 mol%  $\text{H}_2\text{O}$ , 0.1 mol%  $\text{NO}$ , 0.1 mol%  $\text{N}_2\text{O}$ , and 99.7 mol%  $\text{O}_2$  is detected by MS.

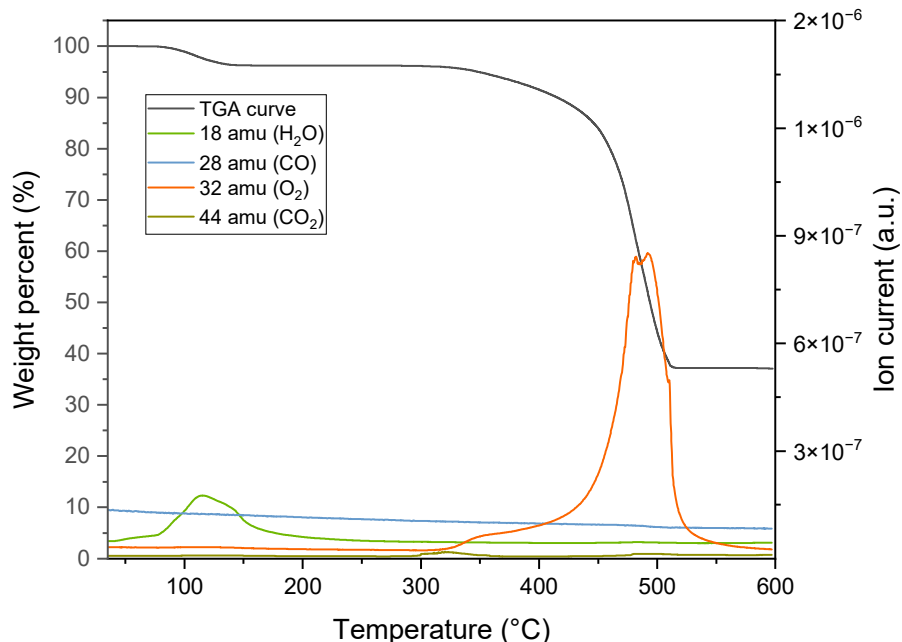

**Figure S14.** TGA-MS data collected for  $\text{LiClO}_4/\text{Ni-MOF-74}$  mixture with 0.10 wt% Ni content showing the weight loss associated with dehydration and subsequent decomposition (black) and the monitored  $m/z$  for  $\text{H}_2\text{O}$  (green),  $\text{CO}$  (blue),  $\text{O}_2$  (orange), and  $\text{CO}_2$  (olive green). During decomposition 0.05 mol%  $\text{CO}$ , 0.64 mol%  $\text{CO}_2$ , and 99.31 mol%  $\text{O}_2$  is detected by MS.

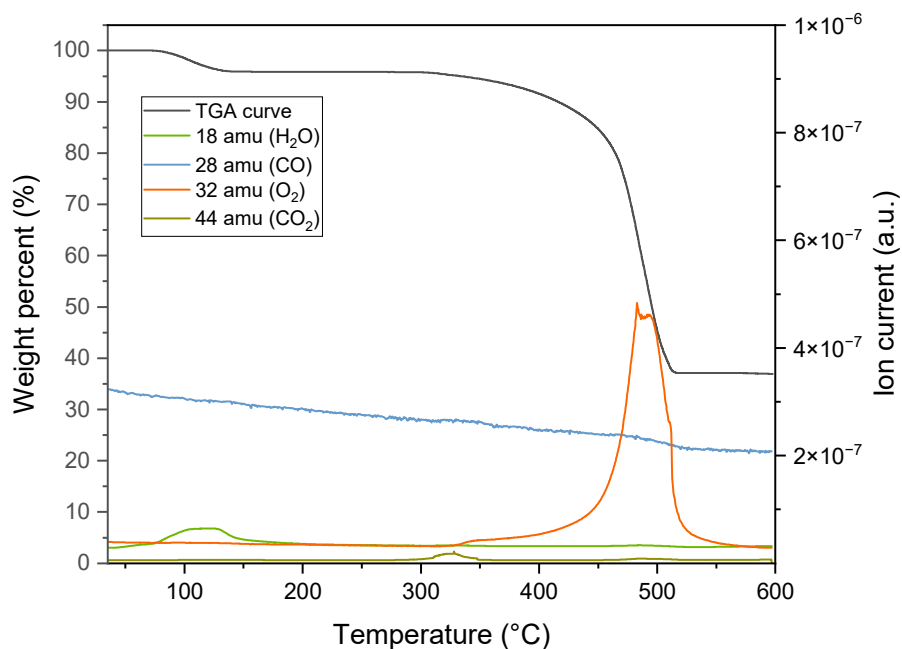

**Figure S15.** TGA-MS data collected for  $\text{LiClO}_4/\text{UMCM-74-I(Ni)}$  mixture with 0.10 wt% Ni content showing the weight loss associated with dehydration and subsequent decomposition (black) and the monitored  $m/z$  for  $\text{H}_2\text{O}$  (green),  $\text{CO}$  (blue),  $\text{O}_2$  (orange), and  $\text{CO}_2$  (olive green). During decomposition 0.10 mol%  $\text{CO}$ , 1.1 mol%  $\text{CO}_2$ , and 98.8 mol%  $\text{O}_2$  is detected by MS.

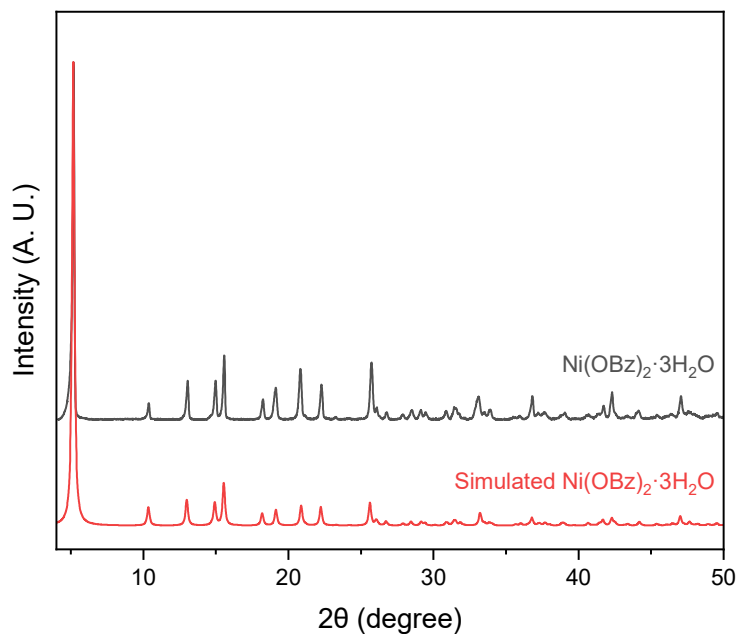

**Figure S16.** PXRD patterns of  $\text{Ni(OBz)}_2 \cdot 3\text{H}_2\text{O}$  (black) and simulated  $\text{Ni(OBz)}_2 \cdot 3\text{H}_2\text{O}$  (red; ref code: EJEDAA).

## S2. Bimetallic catalyst study

To assess potential bimetallic catalytic synergy for  $\text{LiClO}_4$  decomposition,  $\text{LiClO}_4$  samples containing  $\sim 2$  wt% catalyst mixtures (relative to composite) were prepared using equimolar combinations of  $\text{Ni}(\text{NO}_3)_2 \cdot 6\text{H}_2\text{O}$  and 14 different metal salts (Table S1).  $\text{LiClO}_4$  and the corresponding metal salts were dissolved in 1 mL of DI  $\text{H}_2\text{O}$  in 4 mL glass vials, vortex mixed, and dried at  $90^\circ\text{C}$  overnight to yield physical mixtures. The thermal decomposition of each  $\text{LiClO}_4$ /bimetallic catalyst mixture was evaluated by TGA and compared to a control sample containing 2 wt%  $\text{Ni}(\text{NO}_3)_2 \cdot 6\text{H}_2\text{O}$ . Among the  $\text{Ni}(\text{NO}_3)_2 \cdot 6\text{H}_2\text{O}$ /metal salt combinations examined, only the  $\text{Sm}(\text{NO}_3)_3 \cdot 6\text{H}_2\text{O}/\text{Ni}(\text{NO}_3)_2 \cdot 6\text{H}_2\text{O}$  exhibited a modest decrease in decomposition onset, midpoint, and completion temperatures relative to the  $\text{Ni}(\text{NO}_3)_2 \cdot 6\text{H}_2\text{O}$  control (vide infra), although these values remained higher than those observed for  $\text{LiClO}_4$ /MOF compositions at the same Ni loading (0.42 wt%) as the  $\text{Ni}(\text{NO}_3)_2 \cdot 6\text{H}_2\text{O}$  control sample (Figure S16). While this result suggests a minor bimetallic synergistic effect relative to the  $\text{Ni}(\text{NO}_3)_2 \cdot 6\text{H}_2\text{O}$  control, the improvement was insufficient to justify incorporation of a second catalyst into the Ni-based MOFs, and the Sm-containing bimetallic catalyst mixture remained less effective than the porous Ni-based MOFs alone.

|                                                                                                                                           | T <sub>d</sub> onset<br>(°C) | T <sub>d</sub> midpoint<br>(°C) | T <sub>d</sub> completion<br>(°C) |
|-------------------------------------------------------------------------------------------------------------------------------------------|------------------------------|---------------------------------|-----------------------------------|
| Ni(NO <sub>3</sub> ) <sub>2</sub> ·6H <sub>2</sub> O (control)                                                                            | 372                          | 461                             | 509                               |
| Sm(NO <sub>3</sub> ) <sub>3</sub> ·6H <sub>2</sub> O / Ni(NO <sub>3</sub> ) <sub>2</sub> ·6H <sub>2</sub> O                               | 358                          | 456                             | 501                               |
| Co(NO <sub>3</sub> ) <sub>2</sub> ·6H <sub>2</sub> O / Ni(NO <sub>3</sub> ) <sub>2</sub> ·6H <sub>2</sub> O                               | 381                          | 462                             | 507                               |
| Al(NO <sub>3</sub> ) <sub>3</sub> ·9H <sub>2</sub> O / Ni(NO <sub>3</sub> ) <sub>2</sub> ·6H <sub>2</sub> O                               | 380                          | 479                             | 515                               |
| Ce(NO <sub>3</sub> ) <sub>2</sub> ·6H <sub>2</sub> O / Ni(NO <sub>3</sub> ) <sub>2</sub> ·6H <sub>2</sub> O                               | 390                          | 470                             | 512                               |
| LiCl / Ni(NO <sub>3</sub> ) <sub>2</sub> ·6H <sub>2</sub> O                                                                               | 397                          | 471                             | 516                               |
| SnCl <sub>2</sub> / Ni(NO <sub>3</sub> ) <sub>2</sub> ·6H <sub>2</sub> O                                                                  | 410                          | 472                             | 516                               |
| Cu(NO <sub>3</sub> ) <sub>2</sub> ·2.5H <sub>2</sub> O / Ni(NO <sub>3</sub> ) <sub>2</sub> ·6H <sub>2</sub> O                             | 446                          | 483                             | 514                               |
| Mn(NO <sub>3</sub> ) <sub>2</sub> ·4H <sub>2</sub> O / Ni(NO <sub>3</sub> ) <sub>2</sub> ·6H <sub>2</sub> O                               | 452                          | 485                             | 512                               |
| Mg(NO <sub>3</sub> ) <sub>2</sub> ·6H <sub>2</sub> O / Ni(NO <sub>3</sub> ) <sub>2</sub> ·6H <sub>2</sub> O                               | 455                          | 491                             | 518                               |
| TiOSO <sub>4</sub> ·xH <sub>2</sub> O / Ni(NO <sub>3</sub> ) <sub>2</sub> ·6H <sub>2</sub> O                                              | 466                          | 488                             | 518                               |
| Zn(NO <sub>3</sub> ) <sub>2</sub> ·6H <sub>2</sub> O / Ni(NO <sub>3</sub> ) <sub>2</sub> ·6H <sub>2</sub> O                               | 469                          | 492                             | 517                               |
| Sr(NO <sub>3</sub> ) <sub>2</sub> / Ni(NO <sub>3</sub> ) <sub>2</sub> ·6H <sub>2</sub> O                                                  | 470                          | 487                             | 521                               |
| Fe(NO <sub>3</sub> ) <sub>2</sub> ·9H <sub>2</sub> O / Ni(NO <sub>3</sub> ) <sub>2</sub> ·6H <sub>2</sub> O                               | 476                          | 492                             | 519                               |
| (NH <sub>4</sub> ) <sub>6</sub> Mo <sub>7</sub> O <sub>24</sub> ·9H <sub>2</sub> O / Ni(NO <sub>3</sub> ) <sub>2</sub> ·6H <sub>2</sub> O | 499                          | 511                             | 526                               |

**Table S1.** Thermal decomposition (T<sub>d</sub>) onset, midpoint, and completion temperatures measured by TGA at 10 °C/min for samples of LiClO<sub>4</sub> containing ~2 wt% catalyst mixtures comprising equimolar ratios of Ni(NO<sub>3</sub>)<sub>2</sub>·6H<sub>2</sub>O and 14 different metal salts.

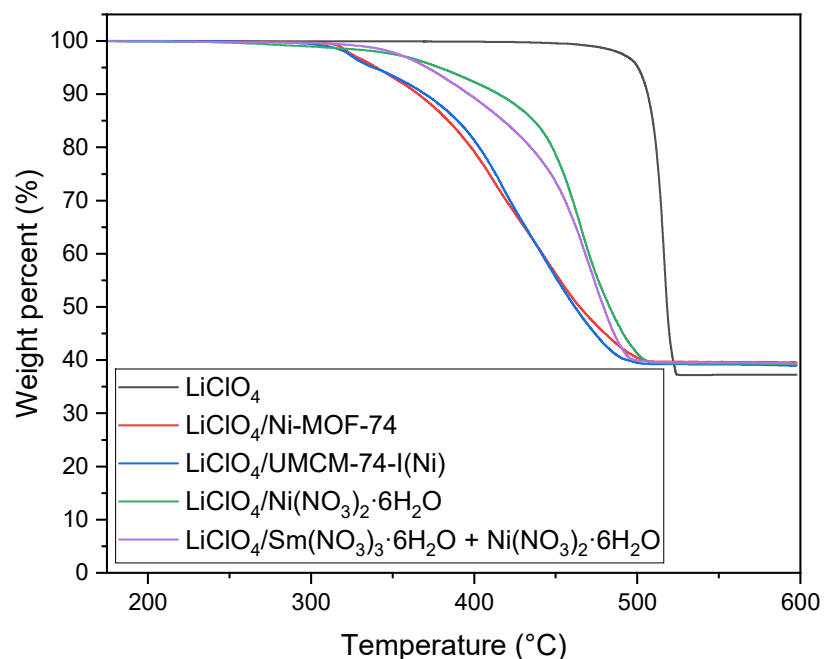

**Figure S17.** TGA thermograms ( $^{\circ}\text{C}/\text{min}$ ) showing decomposition of pure  $\text{LiClO}_4$  (black) and  $\text{LiClO}_4$  mixtures with Ni-MOF-74 (red), UMCM-74-I(Ni) (blue), and  $\text{Ni(NO}_3)_2 \cdot 6\text{H}_2\text{O}$  (green) at 0.42 wt% Ni loading, along with  $\text{LiClO}_4$  containing a  $\sim 2$  wt% equimolar  $\text{Sm(NO}_3)_3 \cdot 6\text{H}_2\text{O}/\text{Ni(NO}_3)_2 \cdot 6\text{H}_2\text{O}$  bimetallic catalyst (post-dehydration).

### **S3. References**

- (1) Tomalia, N. A.; Rakova, Y.; Tubman, A. N.; Matzger, A. J. Tunable On-Demand Explosives Derived from Isorecticular Metal–Organic Framework Nanocomposites. *Chem. Mater.* **2026**, *38* (4), 2055–2062. <https://doi.org/10.1021/acs.chemmater.5c03363>.
